# Supplementary material for: Chinese dumpling-like NaTi2(PO4)3/MXene@reduced graphene oxide for capacitive deionization with high capacity and good cycling stability
Source: Royal Society of Chemistry journal article supplement (doi:10.1039/d3ta02715e), 2023-01-01
Supplement: d3ta02715e1.pdf [file d3ta02715e1.pdf]

## Supporting Information

### **Chinese dumpling-like $\text{NaTi}_2(\text{PO}_4)_3/\text{MXene}@$ Reduced Graphene for Capacitive deionization with High Capacity and Increased Cycling Stability**

Xiaojie Shen<sup>1, 2, 3, ‡</sup>, Yuecheng Xiong<sup>4, 5, 6, ‡</sup>, Fei Yu<sup>1\*</sup>, Jie Ma<sup>2, 4\*</sup>

1 College of Marine Ecology and Environment, Shanghai Ocean University, Shanghai

201306, P.R. China, E-mail: [fyu@vip.163.com](mailto:fyu@vip.163.com)

2 School of Civil Engineering, Kashi University, Kashi 844000, China

3 Marine Science and Technology College, Zhejiang Ocean University, Zhoushan

316004, P.R. China.

4 Research Center for Environmental Functional Materials, College of Environmental

Science and Engineering, Tongji University, 1239 Siping Road, Shanghai 200092,

P.R. China

5 Department of Chemistry, City University of Hong Kong, Kowloon, Hong Kong,

China

6 Hong Kong Branch of National Precious Metals Material Engineering Research

Center (NPMM), City University of Hong Kong, Kowloon, Hong Kong, China.

‡These authors contributed equally to this work.

## **Experimental methods**

### **1 Preparation of 2D delaminated $\text{Ti}_3\text{C}_2\text{T}_x$ MXene**

One gram of LiF (>98%) was dissolved in 20 mL of 9 M HCl. Then, 1 g of sieved  $\text{Ti}_3\text{AlC}_2$  powders (400 mesh) was added. The mixture was kept at 40°C for 24 h under stirring with a magnetic stirrer. The resulting solid residue was washed several times with deionized water and centrifuged at a speed of 3500 rpm until the pH of the supernatant was approximately 6. The powder was mixed with deionized water and sonicated for 1 h under an ice-bath, through which Ar gas was bubbled. The resulting solution was centrifuged for 40 min at a speed of 4000 rpm. Finally, the 2D delaminated  $\text{Ti}_3\text{C}_2\text{T}_x$  colloidal was obtained. To determine the volumetric density, a syringe was used to pull out 3 ml of the colloidal suspension to filter a film. The remaining suspension was stored in sealed bottles under Ar. After drying in air, it was weighed. For all the work conducted herein, the 2D delaminated  $\text{Ti}_3\text{C}_2\text{T}_x$  MXene solution concentration was approximately 3 mg/mL.

### **2 Material characterization**

Scanning electron microscopy (SEM, Hitachi 54800, Japan) and transmission electron microscopy (TEM, JEOL-2010F, Japan) were used to analyze the morphology and microstructure. The crystal structures were analyzed using X-ray diffraction (XRD, D8 Advance, Bruker, Germany) operated at 40 mA and 45 kV with Cu  $K\alpha$  radiation ( $\lambda=0.15418$  nm, 5°/min, 3-65°). The Brunauer-Emmett-Teller (BET) isotherms and specific surface area (BET surface area) were obtained using a Belsorp Mini-II instrument (Japan) at 77 K. The pore size distribution profile was analyzed using the Barrett-Joyner-Halenda (BJH) model. X-ray photoelectron spectroscopy (XPS Kratos Axis UltraDLD SHIMADZU, Japan) was performed using monochromated Al  $K\alpha$  X-rays at a base pressure of  $1\times 10^{-9}$  Torr.

### 3 Electrochemical measurement

The AC EDL electrode consisted of 80% active material, 10% acetylene black and a 10% polyvinylidene difluoride (PVDF) binder in N-methyl-2-pyrrolidone (NMP) on a graphite sheet (mass ratio). Constant voltage (CV) and galvanostatic charging-discharging (GCD) tests were performed on a three-electrode electrochemical workstation (CHI660D, Chenhua Instruments Co., China), using Pt as the counter electrode, Ag/AgCl as the reference electrode, and 1 M NaCl as the electrolyte. The specific capacitance ( $C$ , F/g) can be obtained from the CV curves using the following equation:

$$C = \int idV / \Delta V m v \quad (1)$$

where  $i$  is the current (A),  $m$  is the mass of the active material (g),  $\Delta V$  is the voltage window (V), and  $v$  is the scan rate (V/s).

Electrochemical impedance spectroscopy (EIS) was applied via a CHI660D instrument with a calomel reference electrode, and the data were obtained using a 5mV amplitude in the frequency range from  $10^5$  Hz to 0.1 Hz.

### 4 Desalination experiments

The electro-sorption experiments were conducted in a batch mode system with an HCDI unit cell, which included an activated carbon (AC) anode, an MXene cathode, an anion exchange membrane (AEM) and a cation exchange membrane (CEM). All the experiments were performed by applying a 30 mA/g electric current density with a flow rate of 50 ml/min, and the feed water was pumped through plastic tubes via a peristaltic pump. The conductivity of the solution was monitored by a conductivity meter (METTLER TOLEDO S230, Switzerland). The volume and temperature of the solution were maintained at 45 mL and 25°C, respectively. The relationship between the conductivity and the concentration was calibrated prior to the deionization experiments.

The desalination capacity ( $\Gamma$ ), removal rates ( $v$ ) and energy consumption (kWh/kg-NaCl) are defined as follows:

$$\Gamma = (C_0 - C_e) \times V / m_t \quad (2)$$

$$v = \frac{\Gamma}{t} \quad (3)$$

$$\text{Energy consumption} = \frac{i \times \int v \, dt}{3.6 \times (C_e - C_0) \times V} \quad (4)$$

where  $C_0$  and  $C_e$  (mg/L) are the initial and final NaCl concentrations, respectively,  $m_t$  (g) is the mass of the MXene electrode,  $i$  is the current (A), and  $V$  (L) is the volume of the NaCl solution.

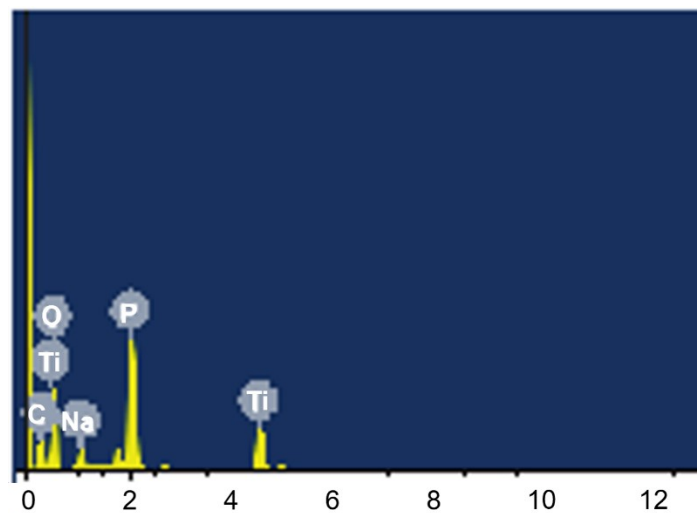

**Figure S1.** EDX spectra of M-NTP/rGO

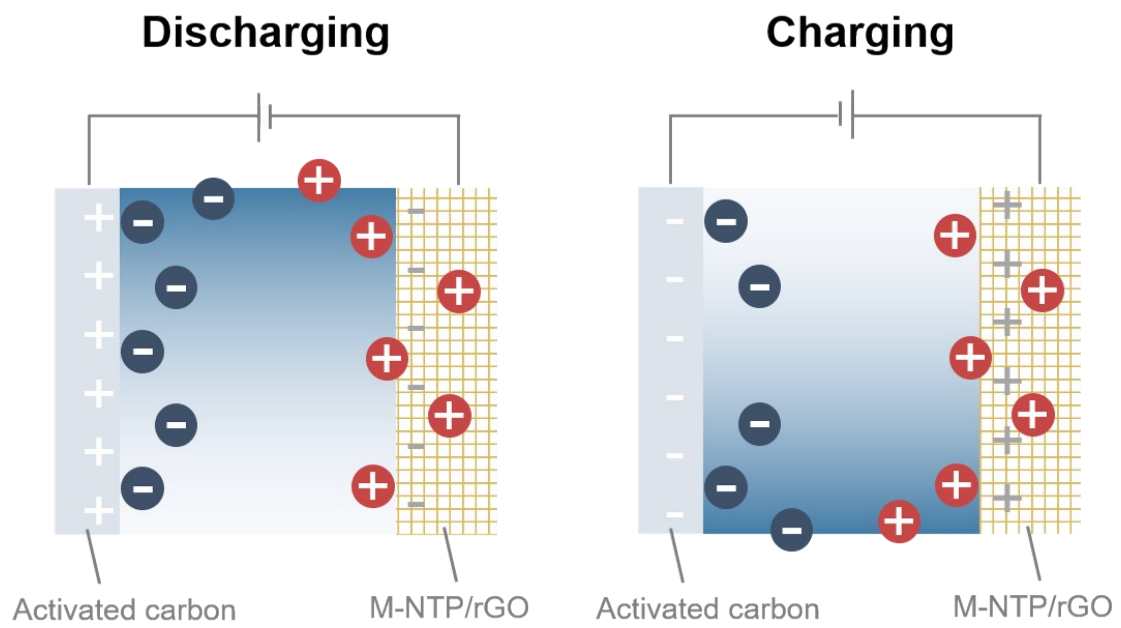

**Figure S2.** Demonstrative graph of discharging and charging process during repetitive capacitive deionization cycles.

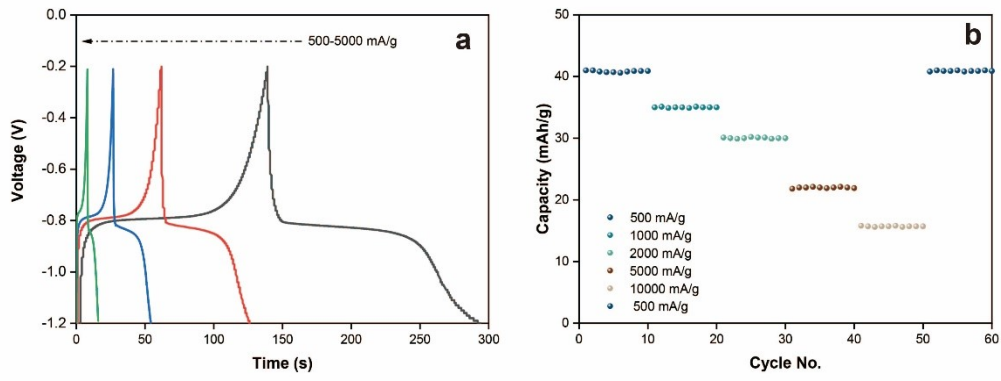

**Figure S3.** (a) Galvanostatic charging/discharging profiles of the M-NTP/rGO electrode at different specific currents. (b) Charging capacity of the M-NTP/rGO electrode at different specific currents.

**Table S1** Comparison of desalination performance among advanced cathode materials in capacitive deionization.

| Materials                                                                                        | Applied voltage (V)              | Initial NaCl concentration (ppm) | SAC ( $\text{mg}_{\text{NaCl}}/\text{g}_{\text{cathode}}$ ) | SAR ( $\text{mg}_{\text{NaCl}}/\text{g}_{\text{cathode}}/\text{min}$ ) | Operation cycles (with SAC retention rate if applicable) | Ref.             |
|--------------------------------------------------------------------------------------------------|----------------------------------|----------------------------------|-------------------------------------------------------------|------------------------------------------------------------------------|----------------------------------------------------------|------------------|
| <b>M-NTP/rGO</b>                                                                                 | <b>1.8, 50 mA g<sup>-1</sup></b> | <b>585</b>                       | <b>251.55</b>                                               | <b>1.63</b>                                                            | <b>100 cycles (80%)</b>                                  | <b>This work</b> |
| porous Ti <sub>3</sub> C <sub>2</sub> T <sub>x</sub>                                             | 1.2                              | 10,000                           | 45                                                          | -                                                                      | 60 cycles (ca.93%)                                       | [1]              |
| L-S-Ti <sub>3</sub> C <sub>2</sub> T <sub>x</sub>                                                | 1.6                              | 292.5                            | 72                                                          | 1.66                                                                   | 50 cycles (90%)                                          | [2]              |
| Ti <sub>3</sub> C <sub>2</sub> T <sub>x</sub> /NiHCF                                             | 1.4                              | 500                              | 85.1                                                        | 15                                                                     | 50 cycles                                                | [3]              |
| NaTi <sub>2</sub> (PO <sub>4</sub> ) <sub>3</sub> /Ti <sub>3</sub> C <sub>2</sub> T <sub>x</sub> | 1.8                              | 1000                             | 128.6                                                       | 29.6                                                                   | 20 cycles                                                | [4]              |
| Bi-ene NSs@MXene                                                                                 | 1.2                              | 1170                             | 88.2                                                        | 9                                                                      | 30 cycles                                                | [5]              |
| Ti <sub>3</sub> C <sub>2</sub> T <sub>x</sub> -NTO/rGO                                           | 1.4                              | 1000                             | 57.6                                                        | 1.14                                                                   | 100 cycles (87.3%)                                       | [6]              |
| PB/PANI                                                                                          | 1.2                              | 500                              | 70                                                          | 24                                                                     | 250 cycles                                               | [7]              |
| MoS <sub>2</sub> /NOMC                                                                           | 1.6                              | 250                              | 28.82                                                       | 0.48                                                                   | 10 cycles                                                | [8]              |
| Ti <sub>3</sub> C <sub>2</sub> T <sub>x</sub> /mPDA                                              | 1.5                              | 500                              | 28.75                                                       | 0.96                                                                   | 200 cycles                                               | [9]              |
| FeNiHCF@HGT                                                                                      | 30 mA g <sup>-1</sup>            | 1755                             | 35                                                          | 1.52                                                                   | 100 cycles (106.6%)                                      | [10]             |
| Antimonene                                                                                       | 1.2                              | 135                              | 31.4                                                        | 0.5                                                                    | 5 cycles                                                 | [11]             |
| TiO <sub>2</sub> /Ti <sub>3</sub> C <sub>2</sub> T <sub>x</sub>                                  | 15 mA g <sup>-1</sup>            | 500                              | 75.62                                                       | 1.3                                                                    | 60 cycles (94%)                                          | [12]             |
| <b>Membrane-free capacitive deionization</b>                                                     |                                  |                                  |                                                             |                                                                        |                                                          |                  |
| Hollow carbon@MnO <sub>2</sub>                                                                   | 1.2                              | 500                              | 30.7                                                        | 7.8                                                                    | 50 cycles (90.1%)                                        | [13]             |
| MnO <sub>2</sub> //Ppy AC                                                                        | 1.4                              | 850                              | 34.15                                                       | 18                                                                     | 50 cycles (80%)                                          | [14]             |
| AC//PTMA                                                                                         | 1.2                              | 250                              | 13.9                                                        | 5                                                                      | 20 cycles                                                | [15]             |

**Note:** SAC, salt adsorption capacity; SAR, salt adsorption rate; PB, Prussian blue; PANI, polyaniline; NTO, sodium titanate; Bi-ene NSs, hierarchical bismuthene nanosheets; NOMC, nitrogen-doped highly ordered mesoporous carbon; mPDA, mesoporous polydopamine; HGT,



hollow graphite tube; Ppy AC, polypyrrole grafted activated carbon; PTMA, poly (2,2,6,6-tetramethylpiperidinyloxy methacrylate).

## References

- [1] Bao, W.; Tang, X.; Guo, X.; Choi, S.; Wang, C.; Gogotsi, Y.; Wang, G., Porous cryo-dried MXene for efficient capacitive deionization. *Joule* **2018**, *2*, (4), 778-787.
- [2] Shen, X.; Xiong, Y.; Hai, R.; Yu, F.; Ma, J., All-MXene-Based Integrated Membrane Electrode Constructed using  $Ti_3C_2T_x$  as an Intercalating Agent for High-Performance Desalination. *Environ. Sci. Technol.* **2020**, *54*, (7), 4554-4563.
- [3] Wang, S.; Li, Z.; Wang, G.; Wang, Y.; Ling, Z.; Li, C., Freestanding  $Ti_3C_2T_x$  MXene/Prussian Blue Analogues Films with Superior Ion Uptake for Efficient Capacitive Deionization by a Dual Pseudocapacitance Effect. *ACS Nano* **2021**, *16*, (1), 1239-1249.
- [4] Chen, Z.; Xu, X.; Ding, Z.; Wang, K.; Sun, X.; Lu, T.; Konarova, M.; Eguchi, M.; Shapter, J. G.; Pan, L.,  $Ti_3C_2$  MXenes-derived  $NaTi_2(PO_4)_3$ /MXene nanohybrid for fast and efficient hybrid capacitive deionization performance. *Chem. Eng. J.* **2021**, *407*, 127148.
- [5] Gong, S.; Liu, H.; Zhao, F.; Zhang, Y.; Xu, H.; Li, M.; Qi, J.; Wang, H.; Li, C.; Peng, W., Vertically aligned bismuthene nanosheets on MXene for high-performance capacitive deionization. *ACS Nano* **2023**, *17*, (5), 4843-4853.
- [6] Shen, X.; Li, L.; Xiong, Y.; Yu, F.; Ma, J., Graphene-assisted  $Ti_3C_2$  MXene-derived ultrathin sodium titanate for capacitive deionization with excellent rate performance and long cycling stability. *J. Mater. Chem. A* **2022**, *10*, (18), 10192-10200.
- [7] Shi, W.; Liu, X.; Deng, T.; Huang, S.; Ding, M.; Miao, X.; Zhu, C.; Zhu, Y.; Liu, W.; Wu, F., Enabling superior sodium capture for efficient water desalination by a

tubular polyaniline decorated with Prussian blue nanocrystals. *Adv. Mater.* **2020**, *32*, (33), 1907404.

[8] Tian, S.; Zhang, X.; Zhang, Z., Novel MoS<sub>2</sub>/NOMC electrodes with enhanced capacitive deionization performances. *Chem. Eng. J.* **2021**, *409*, 128200.

[9] Li, Q.; Xu, X.; Guo, J.; Hill, J. P.; Xu, H.; Xiang, L.; Li, C.; Yamauchi, Y.; Mai, Y., Two-dimensional MXene-polymer heterostructure with ordered in-plane mesochannels for high-performance capacitive deionization. *Angew. Chem. Int. Ed.* **2021**, *133*, (51), 26732-26738.

[10] Tang, Z.; Hu, B.; Nie, P.; Shang, X.; Yang, J.; Liu, J., Bimetallic Fe, Ni-PBA on hollow graphite tube for capacitive deionization with exceptional stability. *Chem. Eng. J.* **2023**, 143216.

[11] Gao, Y.; Lin, C.; Zhang, K.; Zhou, W.; Guo, S.; Liu, W.; Jiang, L.; Zhang, S.; Zeng, H., Pressurized alloying assisted synthesis of high quality antimonene for capacitive deionization. *Adv. Funct. Mater.* **2021**, *31*, (34), 2102766.

[12] Liu, N.; Yu, L.; Liu, B.; Yu, F.; Li, L.; Xiao, Y.; Yang, J.; Ma, J., Ti<sub>3</sub>C<sub>2</sub>-MXene Partially Derived Hierarchical 1D/2D TiO<sub>2</sub>/Ti<sub>3</sub>C<sub>2</sub> Heterostructure Electrode for High-Performance Capacitive Deionization. *Adv. Sci.* **2023**, *10*, (2), 2204041.

[13] Wang, S.; Wang, G.; Wu, T.; Li, C.; Wang, Y.; Pan, X.; Zhan, F.; Zhang, Y.; Wang, S.; Qiu, J., Membrane-Free Hybrid Capacitive Deionization System Based on Redox Reaction for High-Efficiency NaCl Removal. *Environ. Sci. Technol.* **2019**, *53*, (11), 6292-6301.

[14] Tan, G.; Lu, S.; Xu, N.; Gao, D.; Zhu, X., Pseudocapacitive Behaviors of

Polypyrrole Grafted Activated Carbon and MnO<sub>2</sub> Electrodes to Enable Fast and Efficient Membrane-Free Capacitive Deionization. *Environ. Sci. Technol.* **2020**, *54*, (9), 5843-5852.

[15] Li, Y.; Ding, Z.; Li, J.; Wang, K.; Lu, T.; Pan, L., Novel membrane-free hybrid capacitive deionization with a radical polymer anode for stable desalination. *Desalination* **2020**, *481*, 114379.
